# Supplementary material for: A novel sensor for visual and selective detection of Hg2+ based on functionalized doped quantum dots
Source: Royal Society of Chemistry journal article supplement (doi:10.1039/d2ay00297c), 2022-01-01
Supplement: d2ay00297c1.pdf [file d2ay00297c1.pdf]

## Supplementary Material

### A novel sensor for visual and selective detection of $\text{Hg}^{2+}$ based on functionalized doped quantum dot

Zhipeng Wu <sup>1</sup>, Chenglin Dai <sup>1</sup>, Yiwu Wang <sup>1</sup>, Lianju Ma, Guangchao Zang, Qian Liu and Shu Zhu <sup>\*</sup>

Laboratory of Pharmacy and Chemistry and Laboratory of Tissue and Cell Biology,  
Lab Teaching & Management Center, Chongqing Medical University, Chongqing

401331, China

Corresponding author: Shu Zhu

E-mail address: [zhushu@cqmu.edu.cn](mailto:zhushu@cqmu.edu.cn), [317083776@qq.com](mailto:317083776@qq.com)

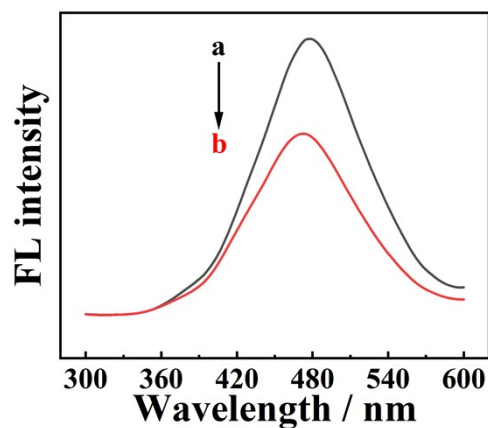

Fig. S1. FL spectra of ZnNC-NQGDs (a) and ZnNC-NQGDs with  $\text{Hg}^{2+}$  ( $1.0 \mu\text{M}$ ) (b).
